# Supplementary material for: Application of Layered Double Hydroxides as a Slow-Release Phosphate Source: A Comparison of Hydroponic and Soil Systems
Source: PubMed Central journal article supplement — ACS Omega. 2023 Apr 20;8(17):15017–30. doi: 10.1021/acsomega.2c07862 (PMC10157694; doi:10.1021/acsomega.2c07862), 2023-04-20
Supplement: ao2c07862_si_001.pdf [file ao2c07862_si_001.pdf]

## **SUPPORTING INFORMATION**

### **Application of Layered Double Hydroxides as Slow-release Phosphate**

#### **Source: A Comparison of Hydroponic and Soil Systems**

Abhinandan Singha Roy<sup>1, 2</sup>, Marinda de Beer<sup>2</sup>, Sreejarani Kesavan Pillai<sup>2</sup>, Suprakas Sinha Ray<sup>1, 2\*</sup>

<sup>1</sup>Department of Chemical Sciences, University of Johannesburg, Doorfontein 2028, Johannesburg, South Africa.

<sup>2</sup>Centre for Nanostructures and Advanced Materials, DSI-CSIR Nanotechnology Innovation Centre, Council for Scientific and Industrial Research, Pretoria 0001, South Africa.

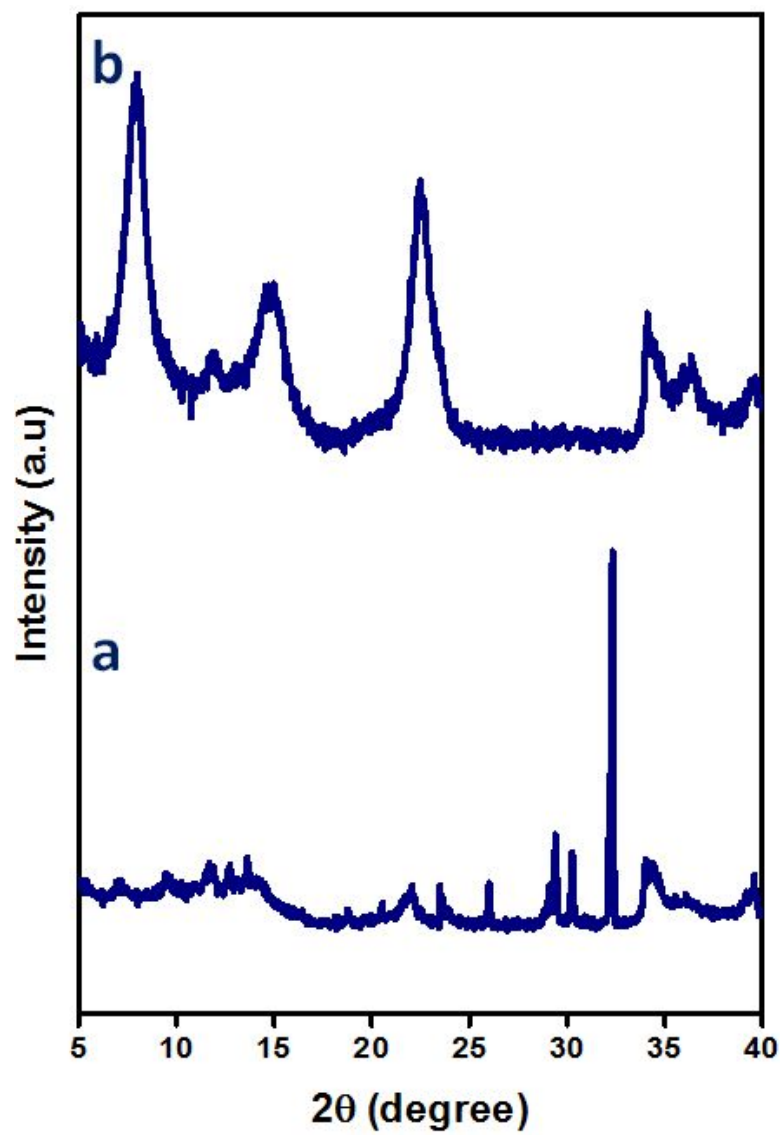

**Figure S1.** The X-ray diffraction pattern of the synthesized P-Zn/Al-LDH in (a) 1 M of  $\text{KH}_2\text{PO}_4$  solution and (b) 0.1 M of  $\text{KH}_2\text{PO}_4$  solution.

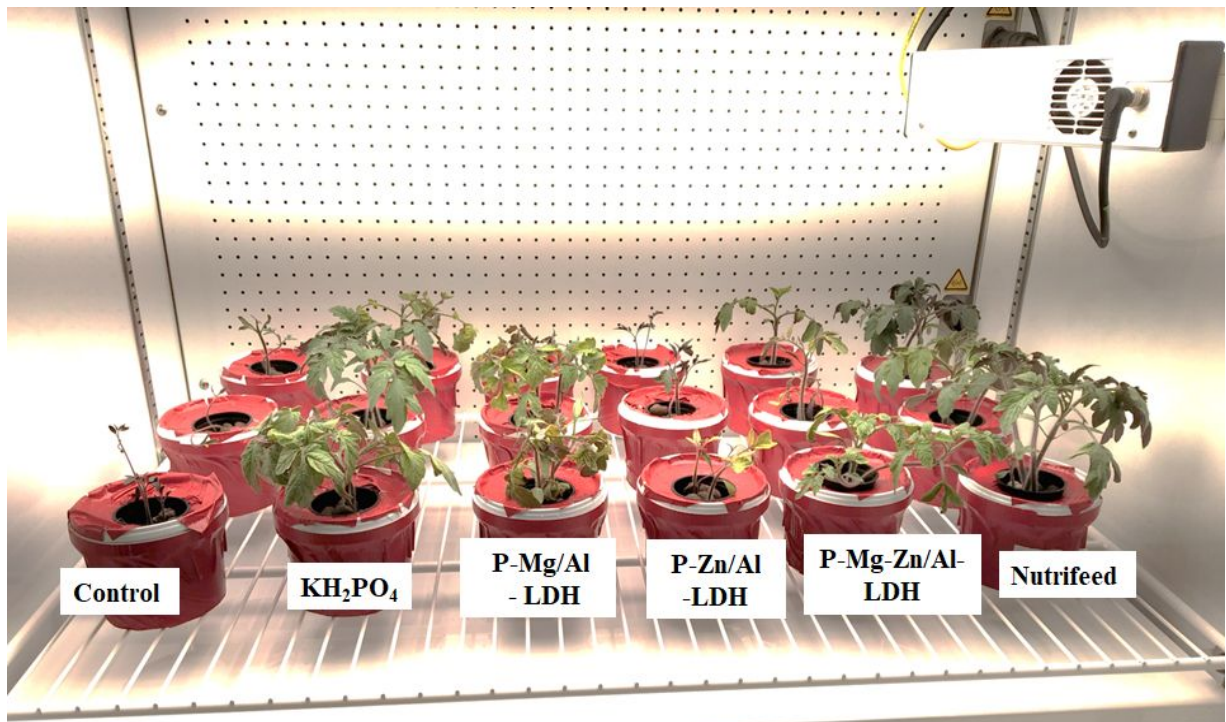

**Figure S2.** Tomato plants growth experiment in hydroponic system on day 24 using different fertilizer materials. ASR, the first author this article, took digital images.

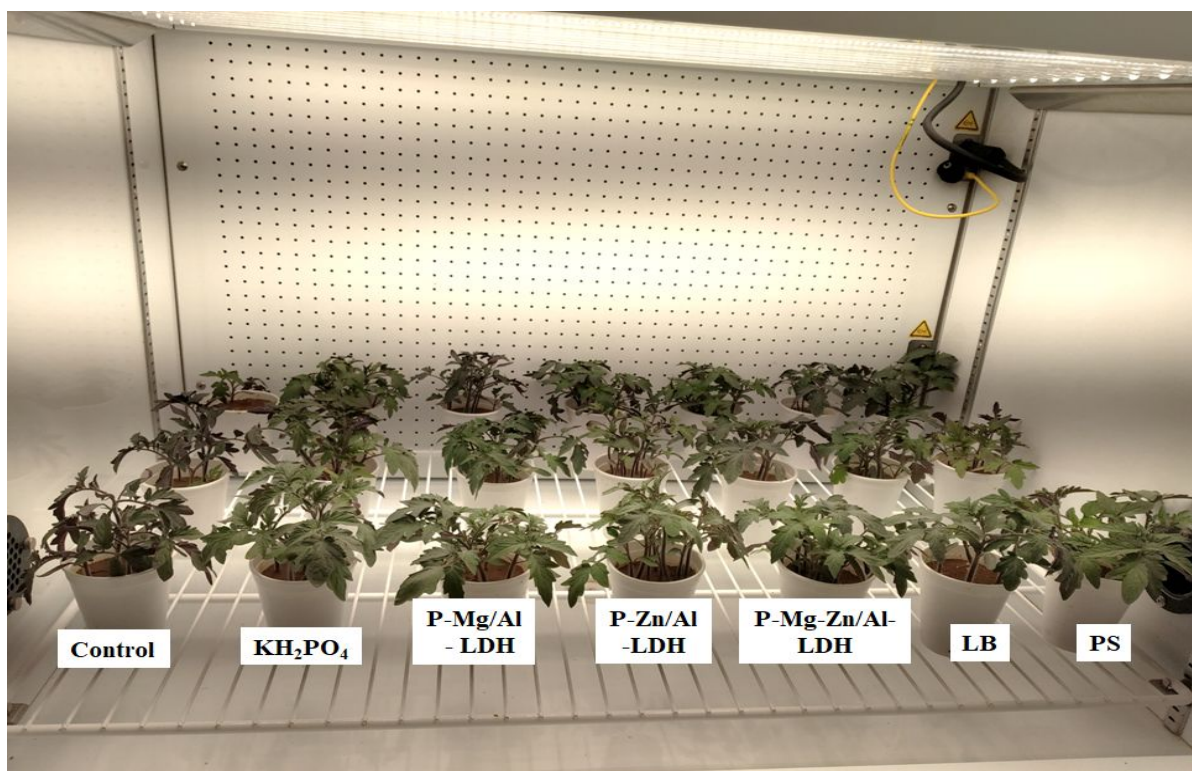

**Figure S3.** Tomato plant growth experiment in soil system on day 24 using different fertilizer materials. ASR, the first author this article, took digital images.
